# Supplementary material for: Socio-cognitive factors influencing access to HIV prevention services among people who inject drugs in Dar es Salaam, Tanzania: An integrated bio-behavioural survey
Source: PLoS One. 2022 Jan 28;17(1):e0261500. doi: 10.1371/journal.pone.0261500 (PMC8797198; doi:10.1371/journal.pone.0261500)
Supplement: S2 Dataset — (XLSX) [file pone.0261500.s002.xlsx]

## Sheet: survey
type	name	label::English	label::Swahili	hint::English	hint::Swahili	constraint	constraint_message::English	constraint_message::Swahili	required	required message::English	required message::Swahili	relevant
text	ra_initials	RA_initials	RA_initials	Enter your initials	Enter your initials				yes	Sorry, this question is required.	Swali hili ni lazima kujibiwa
barcode	barcode	Scan barcode	Scan barcode						yes	Sorry, this question is required.	Swali hili ni lazima kujibiwa
note	demographic	First, I would like to ask you a few questions on your background, including information on your age, education, jobs and income.	Kwanza ninapenda kukuuliza maswali machache kuhusiana na taarifa zako binafsi zikiwemo zile za umri wako, elimu, kazi/ajira na kipato chako.
select_one sex	sex	Sex	Q101. Sex						yes	Sorry, this question is required.	Swali hili ni lazima kujibiwa
integer	age	How old are you?	Q102. Una miaka mingapi?	(In completed years)	Jaza miaka kwa ukamilifu. Hakikisha kuwa mshiriki ana umri wa miaka 15 na zaidi.	. >=15	Respondent must be 15 or older to compete the survey	Ni lazima mshiriki awe na umri wa miaka 15 au zaidi ili aweze kushiriki katika utafiti.	yes	Sorry, this question is required.	Swali hili ni lazima kujibiwa
select_one school	school	How many years of education have you completed up to now?	Q103. Ni kiwango gani cha elimu ulichofikia?						yes	Sorry, this question is required.	Swali hili ni lazima kujibiwa
select_one marital_status	marital_status	What is your current marital status?	Q104. Ni ipi hali yako ya ndoa kwa sasa?	Do not read out the possible answers. Mark only one response.	Usimsomee majibu yanayoweza kutolewa. Chagua jibu moja tu.				yes	Sorry, this question is required.	Swali hili ni lazima kujibiwa
integer	time	How long have you lived here (Dar)?	Q105. Umeishi hapa (Dar) muda gani? (miaka)	If number of years in Dar is unknown, ask for an estimate. If less than one year, enter 0. If 1 1/2 round up to 2. If born and raised in Dar, enter 96. If participant refuses to respond, enter 98.	Kama miaka ya kuishi Dar haijulikani, ulizia makadirio. Kama chini ya mwaka mmoja, andika 0. Kama amesema mwaka moja na nusu, kadiria kwenda miaka miwili. Kama amezaliwa na kukulia Dar, andika 96. Kama mshiriki akikataa kujibu, andika 98.				yes	Sorry, this question is required.	Swali hili ni lazima kujibiwa
select_one district	residence	Where do you currently live?	Q106. Sasa hivi unaishi wapi?	Select the participant district of residence	Chagua wilaya anayoishi mshiriki				yes	Sorry, this question is required.	Swali hili ni lazima kujibiwa
select_one living or_other	living	Currently, with whom are you living?	Q107. Sasa hivi unaishi na nani?	Read out the possible answers. Mark only one response.	Soma majibu yanayoweza kutolewa. Chagua jibu moja tu.				yes	Sorry, this question is required.	Swali hili ni lazima kujibiwa
integer	income	How much income did you earn in the past month?	Q108. Katika mwezi uliopita, kipato chako binafsi kilikua ni kiasi gani?	Answer in Tanzanian shillings. If exact amount is not known, ask for an estimate.	Jibu liwe kwa shilingi za Kitanzania. Kama kiasi kamili hakijulikani, dodosa makadirio.				yes	Sorry, this question is required.	Swali hili ni lazima kujibiwa
select_multiple work or_other	work	How do you earn money?	Q109. Ni kwa njia gani unajipatia kipato?	Do not read out the possible answers. Mark all mentioned.	Usimsomee majibu yanayoweza kutolewa. Chagua majibu yote yatakayo tolewa.				yes	Sorry, this question is required.	Swali hili ni lazima kujibiwa
select_one yes_no_1	bss_1	Did you participate in a study where you received a GREEN coupon?	Q110. Hivi karibuni umeshiriki katika utafiti kama huu na kupewa kuponi ya rangi ya kijani?	Refers to ongoing MSM study - not studies done in previous years.	Hii inahusu utafiti unaoendelea (MSM) na sio tafifi zilizofanyika miaka iliyopita.				yes	Sorry, this question is required.	Swali hili ni lazima kujibiwa	selected(${sex},'male')
select_one yes_no_1	bss_2	Did you participate in a study where you received a RED coupon?	Q111. Hivi karibuni umeshiriki katika utafiti kama huuna kupewa kuponi ya rangi ya nyekundu?	Refers to ongoing FSW study - not studies done in previous years.	Hii inahusu utafiti unaoendelea (FSW) na sio tafifi zilizofanyika miaka iliyopita.				yes	Sorry, this question is required.	Swali hili ni lazima kujibiwa	selected(${sex},'female')
select_one yes_no_1	bss_3	Have you participated in any studies like this one where you received a coupon about 4 years ago, in 2013?	Q112. Umewahi kushiriki kwenye utafiti kama huu ambapo ulipewa kuponi, miaka minne iliyopita, yaani 2013?	Refers to study done in 2013.	Hii inahusu utafiti uliofanyika mwaka 2013.				yes	Sorry, this question is required.	Swali hili ni lazima kujibiwa
note	network	Now I would like to ask you some questions about other PWID that you may know, including the person who recruited you into this study.	Sasa ningependa kukuuliza maswali yanayohusiana na watu wengine wanaotumia madawa ya kulevya kwa njia ya kujidunga sindano ambao unawajua, akiwemo yule aliyekuleta katika utafiti huu.
integer	pwid_1	How many PWID do you know personally?	Q201. Ni watu wangapi wanaotumia madawa ya kulevya kwa njia ya kujidunga sindano ambao wewe binafsi unawajua majina yao na wao wanakujua wewe	Only count those who live in Dar, are 15 years and above, you know their name, you know who they are and they know you. If exact number is unknown, ask for an estimate.	Hawa ni wale ambao wanaishi hapa Dar, wenye umri wa miaka 15 na zaidi, unaowajua majina yao, na wao wanakujua. Kama namba kamili haijulikani, dodosa makadirio.				yes	Sorry, this question is required.	Swali hili ni lazima kujibiwa
integer	pwid_2	How many of these (repeat the number given in prior question) PWID have you seen during the past one month?	Q202. Ni wangapi kati ya hao (rudia idadi iliyotajwa kwenye jibu la swali la nyuma) umewaona katika kipindi cha mwezi mmoja uliopita?	If exact number of PWID is unknown, ask for an estimate.	Kama namba kamili ya PWID haijulikani, dodosa makadirio.	. <=${pwid_1}	Answer must be less than or equal to response to previous question	Jibu lazima liwe chini au sawa na jibu lililotolewa katika swali lililopita	yes	Sorry, this question is required.	Swali hili ni lazima kujibiwa
select_one yes_no	recruiter_1	Would you have given a coupon to the same person who gave this coupon to you?	Q203. Je ungeweza kumpatia kuponi yule mtu aliyekupatia kuponi hii?						yes	Sorry, this question is required.	Swali hili ni lazima kujibiwa
select_one enrollment or_other	enrollment	What is the primary reason you decided to accept a coupon and enroll in the study?	Q204. Ni sababu ipi ya msingi iliyokufanya uamue kukubali kupokea kuponi na kujiunga katika utafiti huu?	Do not read responses. Mark only one response.	Usimsomee majibu yanayoweza kutolewa. Chagua jibu moja tu.				yes	Sorry, this question is required.	Swali hili ni lazima kujibiwa
select_one recruiter_1	recruiter_2	Which of the following best describes your relationship to the person who recruited you?	Q205. Ni ipi kati ya yafuatayo yanaelezea uhusiano wako na aliyekuleta kwenye utafiti huu, yaani, yule aliyekupa kuponi ya ushiriki?	Read responses. Mark only one response.	Msomee majibu. Chagua jibu moja tu.				yes	Sorry, this question is required.	Swali hili ni lazima kujibiwa
select_one recruiter_2	recruiter_3	How often do you see the person who referred you to this study?	Q206. Mara ngapi unaonana na aliyekuleta katika utafiti huu?	Do not read responses. Mark only one response.	Usimsomee majibu yanayoweza kutolewa. Chagua jibu moja tu.				yes	Sorry, this question is required.	Swali hili ni lazima kujibiwa
select_one recruiter_3	recruiter_4	About how long have you known the person who referred you to this study?	Q207. Ni muda gani sasa tokea umjue aliyekuleta katika utafiti huu?	Do not read responses. Mark only one response.	Usimsomee majibu yanayoweza kutolewa. Chagua jibu moja tu.				yes	Sorry, this question is required.	Swali hili ni lazima kujibiwa
select_one yes_no	object_1	Did you ever receive this object?	Q208. Je, umepokea kifaa kama hiki?	Show object to participant.	Muonyeshe mshiriki kifaa husika.				yes	Sorry, this question is required.	Swali hili ni lazima kujibiwa
select_one object	object_2	When did you receive this special object?	Q209. Umepokea lini kifaa hiki?						yes	Sorry, this question is required.	Swali hili ni lazima kujibiwa	selected(${object_1},'yes')
select_multiple object_color	object_3	What color was the object you received?	Q210. Kifaa ulichopokea kilikua cha rangi gani?	Individual could have received more than one object. Mark all that apply.	Anaweza kuwa amepokea kifaa chenye rangi zaidi ya moja. Chagua majibu yote yatakayotolewa.				yes	Sorry, this question is required.	Swali hili ni lazima kujibiwa	selected(${object_1},'yes')
note	drug_use_note	Now I would like to ask you some questions drug use, with and without a needle. These are very personal matters but they are very important for providing health services. Please remember that the answers to your questions are confidential and completely private.	Sasa ningependa kukuuliza maswali ya ujumla kuhusu matumizi ya dawa za kulevya kwa kujidunga sindano au bila ya kujidunga sindano. Haya ni mambo ya kibinafsi, lakini ni muhimu sana katika kutoa huduma za afya. Tafadhali kumbuka kuwa majibu yako utakayoyatoa ni siri na hakuna atakayejua.
select_one alcohol_frequency	alcohol_frequency	In the past one month, how often did you have a drink containing alcohol?	Q301. Katika kipindi cha mwezi mmoja uliopita, ni mara ngapi ulikunywa kinwaji chenye kilevi (pombe)?	Do not read responses. Mark one response only.	Usimsomee majibu; chagua jibu moja tu				yes	Sorry, this question is required.	Swali hili ni lazima kujibiwa
select_one alcohol_drinks	alcohol_drinks	How many drinks containing alcohol do you have on a typical day when you are drinking?	Q302. Ni vinywaji vingapi vyenye kilevi unatumia kwa siku moja unapokunywa?	Do not read responses. Mark one response only.	Usimsomee majibu; chagua jibu moja tu				yes	Sorry, this question is required.	Swali hili ni lazima kujibiwa	not(selected(${alcohol_frequency},'never'))
integer	age_injection	How old were you when you first injected drugs?	Q303. Ulikua na umri gani ulipoanza kutumia dawa za kulevya kwa njia ya kujidunga sindano?	If exact age is unknown, ask for an estimate.	Kama umri kamili haujulikani, dodosa makadirio.				yes	Sorry, this question is required.	Swali hili ni lazima kujibiwa
select_one introduce_drug or_other	introduce_drug	Who was the person who introduced you to injecting?	Q304. Nani alikuingiza katika utumiaji wa dawa za kulevya kwa njia ya kujidunga sindano?						yes	Sorry, this question is required.	Swali hili ni lazima kujibiwa
select_one yes_no_2	non_injected_drugs_1	Have you taken any non-injected drugs other than alcohol in the last three months?	Q305. Umewahi kutumia dawa za kulevya za aina nyingine yeyote ukiondoa zile za njia ya kujidunga sindano na pombe katika kipindi cha miezi 3 iliyopita?						yes	Sorry, this question is required.	Swali hili ni lazima kujibiwa
select_multiple drugs_1 or_other	non_injected_drugs_2	What types of non-injected drugs have you used in the past three months?	Q306. Ni aina gani ya dawa za kulevya ulizotumia zisizo za kujidunga sindano katika kipindi cha miezi 3 iliyopita?	Do not read responses. Probe and select all that apply.	Usimsomee majibu. Dodosa na chagua majibu yote yatakayotolewa.				yes	Sorry, this question is required.	Swali hili ni lazima kujibiwa	selected(${non_injected_drugs_1},'yes')
select_multiple drugs_2 or_other	injection_drugs_1	Which types of drugs have you injected in the past three months?	Q307. Ni aina zipi za madawa uliyojidunga sindano katika kipindi cha miezi 3 iliyopita?	Do not read responses. Probe and select all that apply.	Usimsomee majibu. Dodosa na chagua majibu yote yatakayotolewa.				yes	Sorry, this question is required.	Swali hili ni lazima kujibiwa
select_one drug_frequency	injection_drugs_2	During the past one month, on average, how often did you inject drugs?	Q308. Katika kipindi cha mwezi mmoja uliopita, kwa wastani, umejidunga sindano za dawa za kulevya mara ngapi?	Do not read responses. Mark one response only.	Usimsomee majibu; chagua jibu moja tu				yes	Sorry, this question is required.	Swali hili ni lazima kujibiwa
select_one needle or_other	needle	During the past one month, where did you most often get your needle/syringe?	Q309. Katika kipindi cha mwezi mmoja uliopita ni wapi ulikuwa unapata zaidi bomba/sindano kwa matumizi yako?	Do not read responses. Mark one response only.	Usimsomee majibu; chagua jibu moja tu				yes	Sorry, this question is required.	Swali hili ni lazima kujibiwa
select_one yes_no_4	clean_needle_1	Can you get a clean needle and syringe any time you need one?	Q310. Unaweza kupata bomba na sindano safi kila mara unapohitaji?	Do not read responses. Mark one response only.	Usimsomee majibu; chagua jibu moja tu				yes	Sorry, this question is required.	Swali hili ni lazima kujibiwa
select_multiple needle_access or_other	needle_access	What things make it difficult for you to access clean needles/syringes?	Q311. Ni mambo gani ambayo hukupelekea kuwa vigumu kwako kupata bomba/sindano zilizo safi kwa matumizi yako?	Read responses. Multiple options possible.	Msomee majibu. Anaweza kutaja jibu zaidi ya moja.				yes	Sorry, this question is required.	Swali hili ni lazima kujibiwa	selected(${clean_needle_1},'no') + selected(${clean_needle_1},'no_response')
select_one needle	clean_needle_2	Last time you were able to get a clean needle, where did you get it?	Q312. Mara ya mwisho ulipoweza kupata sindano na bomba safi, uliipata wapi?						yes	Sorry, this question is required.	Swali hili ni lazima kujibiwa	selected(${clean_needle_1},'yes')
select_one yes_no_5	flashblood	During the past one month, did you inject blood from someone who had taken drugs? (Flashblood)	Q313. Katika kipindi cha mwezi mmoja uliopita, umejidunga damu ya mtumiaji mwingine wa madawa ya kulevya? (Flashblood)						yes	Sorry, this question is required.	Swali hili ni lazima kujibiwa
note	sharing_needle_note	Now I would like to ask you some questions about sharing needles. Sharing means using the same needle and/or syringe as someone else to inject drugs.	Sasa ningependa kuuliza maswali kuhusiana na kushirikiana matumizi ya sindano. Kushirikiana maana yake ni kutumia bomba/sindano moja na mtu mwingine kujidunga dawa za kulevya.
select_one yes_no_5	sharing_needle_1	Have you ever shared a needle with someone else when you injected?	Q401. Umewahi kushirikiana bomba/sindano na mtu mwingine wakati ulipojidunga dawa za kulevya?						yes	Sorry, this question is required.	Swali hili ni lazima kujibiwa
begin group	sharing_needle_group_1											not(selected(${sharing_needle_1},'no'))*not(selected(${sharing_needle_1},'do_not_know_remember'))
select_one yes_no_5	sharing_needle_2	In the past one month, when you injected, did you use a needle previously used by someone else?	Q402. Katika kipindi cha mwezi mmoja uliopita uliwahi kutumia bomba/sindano ambavyo vimeshatumiwa na mtu mwingine?						yes	Sorry, this question is required.	Swali hili ni lazima kujibiwa
select_one injection_frequency	sharing_needle_3	During the past one month, when you injected, how often did you use needles/syringes that had previously been used by someone else?	Q403. Katika kipindi cha mwezi mmoja uliopita, ni mara ngapi ulitumia bomba/sindano ambayo imeshatumiwa na mtu mwingine?						yes	Sorry, this question is required.	Swali hili ni lazima kujibiwa	not(selected(${sharing_needle_2},'no'))
select_one injection_frequency_1	sharing_needle_4	During the past one month, how often did you clean the syringe and needle that had previously been used by someone else before you used it again?	Q404. Katika kipindi cha mwezi mmoja uliopita, ni mara ngapi ulisafisha bomba/sindano ambayo imeshatumiwa na mtu mwingine kabla wewe kuitumia tena?						yes	Sorry, this question is required.	Swali hili ni lazima kujibiwa	not(selected(${sharing_needle_2},'no'))
begin group	clean_needle											not(selected(${sharing_needle_4},'never'))
select_multiple clean_needle or_other	sharing_needle_5	If cleaned, how did you usually clean the syringe and needle?	Q405. Ni ipi kati ya yafuatayo ulitumia kusafishia bomba/sindano?	Read list. Mark all that apply.	Msomee majibu. Chagua majibu yote yatakayotolewa.				yes	Sorry, this question is required.	Swali hili ni lazima kujibiwa	not(selected(${sharing_needle_2},'no'))
end group
select_multiple sharing_partner or_other	sharing_needle_6	During the past one month, have you shared needles/syringes with:	Q406. Katika kipindi cha mwezi mmoja uliopita ni nani kati ya wafuatao umewahi kushirikiana nao bomba/sindano:	Read list, select all mentioned.	Msomee majibu, Chagua majibu yote yatakayotolewa.				yes	Sorry, this question is required.	Swali hili ni lazima kujibiwa	not(selected(${sharing_needle_2},'no'))
end group
note	injection_note	Now I would like to ask you some questions about the last time you injected drugs.	Sasa ningependa kuuliza maswali kuhusu mara ya mwisho ulipojidunga sindano ya dawa za kulevya.
select_one drugs_2 or_other	injection_drug_type	The last time you injected, what drug did you use?	Q407. Mara ya mwisho ulipojidunga sindano ulitumia aina gani ya dawa ya kulevya?	Do not read responses. Mark one response only.	Usimsomee majibu. Chagua jibu moja tu.				yes	Sorry, this question is required.	Swali hili ni lazima kujibiwa
integer	injection_drugs_cost	The last time you injected, how much did you spend on the drugs?	Q408. Mara ya mwisho ulipojidunga sindano ulitumia kiasi gani cha fedha kununulia dawa hiyo?	Answer in Tanzanian shillings. If exact amount is unknown, ask for an estimate. If they give a range, provide the average.	Jibu liwe kwa shilingi za Kitanzania. Kama kiasi kamili hakijulikani, dodosa makadirio. Ikiwa atatoa kwa kukisia weka kiwango cha wastani.				yes	Sorry, this question is required.	Swali hili ni lazima kujibiwa
select_one yes_no_5	injection_new_needle	The last time you injected, did you use a new sterile needle, a needle with an intact seal that had never been used before, not even by you?	Q409. Mara ya mwisho ulipojidunga sindano, je ulitumia sindano na bomba jipya, ambalo pia hujawahi kulitumia wewe mwenyewe?						yes	Sorry, this question is required.	Swali hili ni lazima kujibiwa
integer	share_needle	The last time you injected, how many other injectors shared the same needle/syringe?	Q410. Mara ya mwisho ulipojidunga sindano, ni watu wangapi wengine walioshirikiana sindano/bomba hilo?	If exact number of injectors is unknown, ask for an estimate. Number should not include interviewee.	Ikiwa namba kamili ya wanaojidunga haijulikani, dodosa makadirio. Idadi atakayotoa isimuhusishe mshiriki mwenyewe.				yes	Sorry, this question is required.	Swali hili ni lazima kujibiwa	not(selected(${sharing_needle_1},'no'))*not(selected(${sharing_needle_1},'do_not_know_remember'))
begin group	sharing_needle_group_2											not(selected(${sharing_needle_1},'no'))*not(selected(${sharing_needle_1},'do_not_know_remember'))
note	share_needle_note_2	Now I would like to ask you a few questions about the last time you shared a needle/syringe. This is not necessarily the last time you injected.	Sasa nitakuuliza kuhusu mara ya mwisho uliposhirikiana bomba/sindano na mtu mwingine. Hii sio lazima iwe mara ya mwisho ulipojidunga madawa.
select_one needle_share or_other	needle_share	The last time you shared needles/syringes with other users, what was the reason?	Q411. Mara ya mwisho uliposhirikiana sindano/bomba na watumiaji wengine, kulikuwa na sababu gani?						yes	Sorry, this question is required.	Swali hili ni lazima kujibiwa
select_one yes_no_5	clean_needle_3	The last time you shared needles/syringes with other users, was the needle/syringe cleaned between users?	Q412. Mara ya mwisho uliposhirikiana sindano/bomba na watumiaji wengine je, sindano/bomba vilisafishwa kabla ya kutumiwa?						yes	Sorry, this question is required.	Swali hili ni lazima kujibiwa
select_multiple clean_needle or_other	clean_needle_4	The last time you shared needles/syringes with other users, what did you use to clean the needle/syringe?	Q413. Mara ya mwisho uliposhirikiana sindano/bomba na watumiaji wengine je, ni ipi kati ya yafuatayo ulitumia kusafishia bomba/sindano?	Read list. Mark all that apply.	Msomee majibu. Chagua majibu yote yatakayotolewa.				yes	Sorry, this question is required.	Swali hili ni lazima kujibiwa	selected(${clean_needle_3},'yes')
end group
note	sexual_behavior	Now I would like to ask you some questions about your sexual history, your sex partners, and your use of condoms. These are very personal matters but they are very important for providing health services. Please remember that your answers will remain completely confidential. Let’s first talk about your non-paying sexual partners.	Sasa ningependa kukuuliza maswali kuhusu historia yako ya kufanya ngono, wenza/wapenzi wako, na matumizi ya kondomu. Haya ni mambo binafsi lakini ni muhimu sana katika kutoa huduma za afya. Tafadhali elewa kwamba majibu yako ni siri kabisa. Tutaanza kwa kukuuliza kuhusu wapenzi wako wasiotoa malipo ya aina yoyote.
select_one yes_no	no_pay_sex_ever	Have you ever had sex with a man or woman where no payment was involved?	Q501. Katika maisha yako yote, umewahi kufanya ngono na mwanamme au mwanamke bila kuhusisha malipo ya aina yeyote?
select_one yes_no	no_pay_sex_1	In the past one month, have you had sex with a man or woman where no payment was involved?	Q502. Katika kipindi cha mwezi mmoja uliopita, ulifanya ngono na mwanamme au mwanamke bila kuhusisha malipo ya aina yeyote?						yes	Sorry, this question is required.	Swali hili ni lazima kujibiwa	selected(${no_pay_sex_ever},'yes')
begin group	no_pay_sex_group											selected(${no_pay_sex_1},'yes')
select_one yes_no	no_pay_sex_2	Was this man/woman your boyfriend/girlfriend/husband/wife or other steady partner?	Q503. Je, uliyefanyanaye ngono alikuwa mwenza/rafiki wako wa muda mrefu?						yes	Sorry, this question is required.	Swali hili ni lazima kujibiwa
integer	no_pay_partner	In the past one month, how many partners have you had vaginal or anal sex with where no payment was involved?	Q504. Katika kipindi cha mwezi mmoja uliopita ulifanya ngono na wenza/wapenzi wangapi bila kutegemea malipo ya aina yoyote?	If exact number of partners is unknown, ask for an estimate.	Ikiwa namba kamili ya wenza haijulikani, dodosa makadirio.				yes	Sorry, this question is required.	Swali hili ni lazima kujibiwa
select_one condom_frequency	condom_no_pay	Of all times you have vaginal or anal sex with a non-paying male or female partner in the last month, how frequently did you use a condom?	Q505. Katika kipindi cha mwezi mmoja uliopita, ni mara ngapi ulitumia kondomu ulipofanya ngono bila kutegemea malipo?						yes	Sorry, this question is required.	Swali hili ni lazima kujibiwa
end group
select_one yes_no_1	condom_last_no_pay	The last time you had vaginal or anal sex with a non-paying male or female partner, did you use a condom?	Q506. Mara ya mwisho ulipofanya ngono bila kutegemea malipo ulitumia kondomu?	This could be before the past one month.	Hii inaweza kuwa kabla ya mwezi mmoja uliopita				yes	Sorry, this question is required.	Swali hili ni lazima kujibiwa	selected(${no_pay_sex_ever},'yes')
note	paid_sex_note	Now I would like to ask you some questions about people you pay for sex. These could be male or female partners you give money or gifts to in exchange for sex.	Sasa ningependa kukuuliza maswali yanayohusina na kufanya ngono na watu unaowalipa. Hawa wanaweza kuwa wanawake au wanaume unaowapa fedha na/au zawadi kwa ajili ya ngono.
select_one yes_no	payment_for_sex_ever	Have you ever paid any woman or man to have vaginal or anal sex with you?	Q507. Katika maisha yako yote, umeshawahi kumlipa mwanamme au mwanamke ili kufanya naye ngono?						yes	Sorry, this question is required.	Swali hili ni lazima kujibiwa
select_one yes_no	payment_for_sex_1	In the past one month, have you paid any woman or man to have vaginal or anal sex with you?	Q508. Katika kipindi cha mwezi mmoja uliopita uliwahi kumlipa mwanamme au mwanamke ili kufanya naye ngono?						yes	Sorry, this question is required.	Swali hili ni lazima kujibiwa	selected(${payment_for_sex_ever},'yes')
begin group	payment_for_sex_group											selected(${payment_for_sex_1},'yes')
integer	payment_for_sex_2	In the past one month, how many different women have you paid to have sex with you?	Q509. Katika kipindi cha mwezi mmoja uliopita ni wanawake wangapi uliwalipa kufanya nao ngono?	If the exact number of women is unknown, ask for an estimate. If the answer is none, write 0.	Ikiwa namba kamili ya wanawake haijulikani, dodosa makadirio. Kama Jibu ni hakuna, jaza 0.				yes	Sorry, this question is required.	Swali hili ni lazima kujibiwa	selected(${sex},'male')
integer	payment_for_sex_3	In the past one month, how many different men have you paid to have sex with you?	Q510. Katika kipindi cha mwezi mmoja uliopita ni wanaume wangapi uliwalipa ili kufanya nao ngono?	If the exact number is unknown, ask for an estimate. If the answer is none, write 0.	Ikiwa namba kamili haijulinani, dodosa makadirio. Kama Jibu ni hakuna, jaza 0.				yes	Sorry, this question is required.	Swali hili ni lazima kujibiwa
integer	payment_for_sex_4	In the past one month, how many times did you pay for sex?	Q511. Katika kipindi cha mwezi mmoja uliopita ni mara ngapi umenunua ngono?	If the exact number is unknown, ask for an estimate.	Ikiwa namba kamili haijulinani, dodosa makadirio.				yes	Sorry, this question is required.	Swali hili ni lazima kujibiwa
select_one condom_frequency	condom_paid_partner	Of all times you paid someone to have sexual intercourse with you in the last month, how frequently did you use a condom?	Q512. Katika mwezi uliopita, ni mara ngapi ulitumia kondomu uliponunua ngono?						yes	Sorry, this question is required.	Swali hili ni lazima kujibiwa
end group
select_one yes_no_1	condom_last_paid	The last time you paid someone for vaginal or anal sex, did you use a condom?	Q513. Mara ya mwisho uliponunua ngono, ulitumia kondomu?	This could be before the past one month.	Hii inaweza kuwa kabla ya mwezi mmoja uliopita				yes	Sorry, this question is required.	Swali hili ni lazima kujibiwa	selected(${payment_for_sex_ever},'yes')
note	paid_sex_note_2	Now I will ask you some questions about people who pay you to have sex with them. These could be friends or people you just met who give you money or gifts to have sex with them.	Sasa nitakuuliza maswali yanayohusiana na watu wanaokulipa wewe kwa ajili ya kufanya nao ngono. Wanaweza wakawa ni marafiki au watu unaokutana nao na kukulipa pesa au zawadi.
select_one yes_no	sell_sex_ever	Has any woman or man ever paid you to have vaginal or anal sex with them?	Q514. Katika maisha yako yote, mwanamme au mwanamke yeyote alishawahi kukulipa ili kufanya nae ngono?						yes	Sorry, this question is required.	Swali hili ni lazima kujibiwa
select_one yes_no	sell_sex_1	In the past one month, has any woman or man paid you to have vaginal or anal sex with them?	Q515. Katika kipindi cha mwezi mmoja uliopita kuna mtu yeyote mwanamke au mwanamme aliyekulipa kufanya nae ngono?						yes	Sorry, this question is required.	Swali hili ni lazima kujibiwa	selected(${sell_sex_ever},'yes')
begin group	sell_sex_group											selected(${sell_sex_1},'yes')
integer	sell_sex_2	In the past one month, how many different women have paid to have vaginal or anal sex with you?	Q516. Katika kipindi cha mwezi mmoja uliopita ni wanawake wangapi waliokulipa ili kufanya nao ngono?	If the exact number of women is unknown, ask for an estimate.	Ikiwa namba kamili ya wanawake haijulikani, dodosa makadirio.				yes	Sorry, this question is required.	Swali hili ni lazima kujibiwa	selected(${sex},'male')
integer	sell_sex_3	In the past one month, how many different men have paid to have sex with you?	Q517. Katika kipindi cha mwezi mmoja uliopita ni wanaume wangapi waliokulipa ili kufanya nao ngono?	If the exact number is unknown, ask for an estimate.	Ikiwa namba kamili haijulinani, ulizia makadirio.				yes	Sorry, this question is required.	Swali hili ni lazima kujibiwa
select_one condom_frequency	condom_sex_work_1	Of all times someone paid you for vaginal or anal sex in the past one month, how frequently did you use a condom?	Q518. Katika mwezi uliopita, ni mara ngapi ulitumia kondomu ulipolipwa kufanya ngono?						yes	Sorry, this question is required.	Swali hili ni lazima kujibiwa
end group
select_one yes_no_1	condom_sex_work_2	The last time a man or woman paid you for vaginal or anal sex, did you use a condom?	Q519. Mara ya mwisho ulipolipwa kufanya ngono, je ulitumia kondomu?	This could be before the past one month.	Hii inaweza kuwa kabla ya mwezi mmoja uliopita				yes	Sorry, this question is required.	Swali hili ni lazima kujibiwa	selected(${sell_sex_ever},'yes')
note	condom_use_note	Now I will ask you some questions on condom use. These are very personal matters but they are very important for providing health services.	Sasa napenda kukuuliza maswali yanayohusu utumiaji wa kondomu za kiume na za kike. Haya ni mambo ya kibinafsi, lakini ni muhimu sana katika kutoa huduma za afya.
select_one yes_no_1	m_condom	Have you ever used a male condom?	Q601. Umeshawahi kutumia kondomu ya kiume?	If respondent is a woman, emphasize that it is her partner wearing the condom	Kama mshiriki ni mwanamke, sisitiza kwamba ni mpenzi wake anayevaa kondomu.				yes	Sorry, this question is required.	Swali hili ni lazima kujibiwa
begin group	m_condom_use_group											selected(${m_condom},'yes')
select_one condom_frequency	m_condom_use	If you had vaginal or anal sex during the past one month, how often did you use a male condom?	Q602. Katika kipindi cha mwezi mmoja uliopita, ni mara ngapi ulitumia kondomu ya kiume?	Do not read responses.	Usimsomee majibu.				yes	Sorry, this question is required.	Swali hili ni lazima kujibiwa
select_one condom_avail_1	m_condom_avail_1	Can you obtain a male condom every time you need one?	Q603. Je, unaweza kupata kondomu za kiume wakati wowote unapoihitaji?						yes	Sorry, this question is required.	Swali hili ni lazima kujibiwa
select_multiple condom_avail_2 or_other	m_condom_avail_2	Why can't you get a male condom every time you need one?	Q604. Kwa nini huwezi kupata kondomu wakati wowote unapoihitaji?	Multiple answers possible. Do not read outloud.	Kunaweza kuwa na jibu zaidi ya moja. Usimsomee majibu.				yes	Sorry, this question is required.	Swali hili ni lazima kujibiwa	selected(${m_condom_avail_1},'no') + selected(${m_condom_avail_1},'no_response')
select_multiple condom_supply or_other	m_condom_supply	Which places or persons have you obtained male condoms from in the last one month?	Q605. Katika kipindi cha mwezi mmoja uliopita, ni wapi au kwa nani ulipata kondomu za kiume?	Do not read responses. Probe and select all that apply.	Usimsomee majibu. Dodosa na chagua majibu yote yatakayotolewa.				yes	Sorry, this question is required.		not(selected(${m_condom_avail_1},'never_needed'))
end group
select_one yes_no_1	f_condom	Have you ever used a female condom?	Q606. Umeshawahi kutumia kondomu ya kike?						yes	Sorry, this question is required.	Swali hili ni lazima kujibiwa
select_one f_condom_supply or_other	f_condom_supply	Where or from whom did you obtain your last female condom?	Q607. Ni wapi au kwa nani ulipata kondomu ya kike kwa mara ya mwisho?						yes	Sorry, this question is required.	Swali hili ni lazima kujibiwa	not(selected(${f_condom}, 'no'))
note	violence_note	Now I will ask you some questions on violence and history of incarceration. These questions are personal and may make you uncomfortable. If they do so, you may choose to not answer the question.	Sasa hivi nitakuuliza maswali yanayohusu kufanyiwa vurugu na kufungwa. Maswali haya ni ya kibinafsi sana na yanaweza kukufanya usijisikie vizuri kuyajibu. Ikiwa utajisikia hivyo, unaweza kuchagua kutokujibu maswali hayo.
select_one yes_no_1	violence_1	In the past 12 months, were you ever beaten?	Q701. Katika miezi 12 iliyopita, umewahi kupigwa?						yes	Sorry, this question is required.	Swali hili ni lazima kujibiwa
select_multiple violence or_other	violence_2	Who was the person (or people) who physically beat you?	Q702. Ni mtu (au watu) gani waliokupiga?	Multiple answers possible. Do not read outloud. Select all that apply.	Kunaweza kuwa na jibu zaidi ya moja. Usimsomee majibu. Chagua majibu yote yatakayotolewa.				yes	Sorry, this question is required.	Swali hili ni lazima kujibiwa	selected(${violence_1}, 'yes')
select_one yes_no_1	sex_violence_1	In the past 12 months, were you ever forced to have sex?	Q703. Katika miezi 12 iliyopita, umewahi kulazimishwa kufanya ngono?						yes	Sorry, this question is required.	Swali hili ni lazima kujibiwa
select_multiple violence or_other	sex_violence_2	Who was the person (or people) who forced you to have sex?	Q704. Ni mtu (au watu) gani waliokulazimisha kufanya ngono?	Multiple answers possible. Do not read outloud. Select all that apply.	Kunaweza kuwa na jibu zaidi ya moja. Usimsomee majibu. Chagua majibu yote yatakayotolewa.				yes	Sorry, this question is required.	Swali hili ni lazima kujibiwa	selected(${sex_violence_1}, 'yes')
select_one yes_no_1	arrested_1	During the past 12 months, have you been arrested?	Q705. Katika miezi 12 iliyopita, umewahi kukamatwa na polisi/mgambo?						yes	Sorry, this question is required.	Swali hili ni lazima kujibiwa
select_multiple arrested or_other	arrested_2	[If yes] What were you arrested for?	Q706. Kwa kosa gani?	Multiple answers possible. Do not read outloud. Select all that apply.	Kunaweza kuwa na jibu zaidi ya moja. Usimsomee majibu. Chagua majibu yote yatakayotolewa.				yes	Sorry, this question is required.	Swali hili ni lazima kujibiwa	selected(${arrested_1}, 'yes')
note	stigma_note	Now I would like to ask you some questions about stigma that may affect you because you inject drugs.	Sasa nitakuuliza maswali kuhusu unyanyapaa kutokana na utumiaji wa dawa za kulevya.
select_one yes_no_2	family_know	Does anyone in your family know that you inject drugs ?	Q801. Je, kuna mtu yeyote katika familia yako anajua kwamba unajidunga madawa?						yes	Sorry, this question is required.	Swali hili ni lazima kujibiwa
note	answer_yes_no	Please answer yes or no to the following statements that refer to your experiences as a PWID in your adult life (>15 years old).	Tafadhali jibu ndio au hapana kwenye sentensi zifuatazo zinazohusu uzoefu wako katika kujidunga madawa, ulipokuwa na umri wa miaka 15 au zaidi.
select_one yes_no_5	teasing	I have experienced name calling, teasing and insults.	Q802. Umewahi kuitwa majina, kukejeliwa na kutukanwa.						yes	Sorry, this question is required.	Swali hili ni lazima kujibiwa
select_one yes_no_5	excluded	I have been excluded from a social gathering.	Q803. Umewahi kutengwa katika shughuli za kijamii.						yes	Sorry, this question is required.	Swali hili ni lazima kujibiwa
select_one yes_no_5	gossiped	I have been gossiped about.	Q804. Umewahi kusengenywa.						yes	Sorry, this question is required.	Swali hili ni lazima kujibiwa
select_one yes_no_5	lost_respect	Other people have lost respect for me.	Q805. Heshima yako imeshuka mbele ya watu.						yes	Sorry, this question is required.	Swali hili ni lazima kujibiwa
select_one yes_no_5	abandoned	I have been abandoned by my loved ones.	Q806. Umeachwa na wanaokupenda.						yes	Sorry, this question is required.	Swali hili ni lazima kujibiwa
note	knowledge_note	Now I will read some statements about HIV/AIDS. Some of them are true and some are not true. These are general statements and do not refer to your own experience or behavior. Please tell me whether you agree or disagree with each of the statements.	Sasa hivi nitasoma maelezo kuhusu virusi/UKIMWI. Baadhi ya maelezo ni sahihi na baadhi si sahihi. Haya ni maelezo ya jumla na hayahusishi kabisa maisha yako au tabia yako. Tafadhali niambie kuwa unakubali au unakataa katika kila maelezo.
select_one yes_no_2	knowledge_1	Can the risk of HIV transmission be reduced by having sex with only one uninfected partner who has no other partners?	Q807. Kufanya ngono na mpenzi mmoja mwaminifu ambaye hajaambukizwa VVU kunapunguza hatari ya maambukizi ya virusi vya UKIMWI						yes	Sorry, this question is required.	Swali hili ni lazima kujibiwa
select_one yes_no_2	knowledge_2	Can a person get HIV from mosquito bites?	Q808. Kuumwa na mbu kunaambukiza virusi vya UKIMWI						yes	Sorry, this question is required.	Swali hili ni lazima kujibiwa
select_one yes_no_2	knowledge_3	Can a person reduce their risk of getting HIV by using a condom every time they have sex?	Q809. Kutumia kondomu kila unapofanya ngono kunazuia maambukizi ya virusi vya UKIMWI						yes	Sorry, this question is required.	Swali hili ni lazima kujibiwa
select_one yes_no_2	knowledge_4	Can a person get HIV by sharing food with someone who has HIV?	Q810. Kula chakula na mtu mwenye virusi vya UKIMWI kunaweza kumfanya mtu kupata maambukizi						yes	Sorry, this question is required.	Swali hili ni lazima kujibiwa
select_one yes_no_2	knowledge_5	Can a healthy looking person have HIV?	Q811. Mtu anayeonekana mwenya afya anaweza kuwa na virusi vya UKIMWI?						yes	Sorry, this question is required.	Swali hili ni lazima kujibiwa
select_one yes_no_2	knowledge_6	Sharing needles when injecting drugs will increase the risk of HIV infection.	Q812. Kushirikiana bomba moja la sindano kujidunga dawa kwa wanaotumia dawa za kulevya, kunaongeza hatari ya maambukizi ya virusi vya UKIMWI						yes	Sorry, this question is required.	Swali hili ni lazima kujibiwa
select_one yes_no_2	knowledge_7	Cleaning needles and syringes between injections reduces the risk of HIV.	Q813. Kusafisha sindano na bomba la sindano kati ya watumiaji kunapunguza hatari ya maambukizi ya virusi vya UKIMWI						yes	Sorry, this question is required.	Swali hili ni lazima kujibiwa
select_one yes_no	prep_1	Have you ever heard of a medication you can take that is like ARVs but you take it to prevent getting HIV?	Q814. Umeshawahi kusikia kuhusu dawa ambayo ipo kama vidonge vya ARV unayoweza kuitumia kwa ajili ya kuzuia kupata maambukizi ya virusi vya UKIMWI?						yes	Sorry, this question is required.	Swali hili ni lazima kujibiwa
select_one yes_no_2	prep_2	If there were a drug you could take everyday to prevent HIV infection would you want to take it?	Q815. Kama kungekua na dawa ambayo ungekua unatumia kila siku kuzuia maambukizi ya virusi vya ukimwi, ungependa kuitumia?						yes	Sorry, this question is required.	Swali hili ni lazima kujibiwa
select_one prep_no	prep_3	[If no] Why not?	Q816. Kwa nini?						yes	Sorry, this question is required.	Swali hili ni lazima kujibiwa	selected(${prep_2},'no')
note	note	Now I will ask some questions about stigma related to HIV/AIDS. Please tell me whether you agree or disagree with each of the statements.	Sasa nitakuuliza maswali kuhusu unyanyapaa unaohusiana na ugonjwa wa UKIMWI. Tafadhali niambie kama unakubaliana au hukubaliani na kila sentensi zifuatazo.
select_one agree_disagree	agree_disagree_1	People with HIV/AIDS should be ashamed of themselves	Q817. Wanaoishi na VVU lazima wajionee haya.						yes	Sorry, this question is required.	Swali hili ni lazima kujibiwa
select_one agree_disagree	agree_disagree_2	I would feel ashamed if someone in my family had HIV/AIDS	Q818. Ningeona haya/aibu iwapo mmoja wa watu wa familia yangu ameambukizwa VVU						yes	Sorry, this question is required.	Swali hili ni lazima kujibiwa
select_one agree_disagree	agree_disagree_3	I would feel ashamed if I were infected with HIV/AIDS	Q819. Ningeona haya iwapo ningekua nimeambukizwa VVU						yes	Sorry, this question is required.	Swali hili ni lazima kujibiwa
select_one agree_disagree	agree_disagree_4	People with HIV/AIDS are promiscuous	Q820. Watu walio na VVU ni wenye kufanya ngono zembe na wapenzi wengi						yes	Sorry, this question is required.	Swali hili ni lazima kujibiwa
select_one agree_disagree	agree_disagree_5	It is PWID who spread HIV in the community	Q821. Ni wanaojidunga madawa ndio wanaoeneza virusi vya UKIMWI katika jamii						yes	Sorry, this question is required.	Swali hili ni lazima kujibiwa
select_one agree_disagree	agree_disagree_6	HIV/AIDS is brought as a punishment for bad behavior	Q822. Virusi vya UKIMWI vimeletwa kama adhabu kwa wenye tabia mbaya						yes	Sorry, this question is required.	Swali hili ni lazima kujibiwa
note	HIV_risk_note	Now I will ask you about how you see your risk for HIV.	Sasa nitakuuliza maswali kuhusu unavyoona hatari yako ya kuambukizwa VVU.
select_one risk_1	risk_1	With your current behaviors, how do you think about your risk of HIV infection?	Q823. Kwa tabia ulizonazo sasa hivi, una hatari kiasi gani ya kuweza kuambukizwa virusi vya UKIMWI?						yes	Sorry, this question is required.	Swali hili ni lazima kujibiwa
select_multiple risk_2 or_other	risk_2	If you feel you are at risk, why do you feel that you are at risk for HIV infection?	Q824. Kama unahisi upo katika hatari ya kupata maambukizi ya virusi vya UKIMWI, kwa nini?	Multiple responses possible, but do not read choices aloud.	Kunaweza kuwa na jibu zaidi ya moja lakini usisome majibu.				yes	Sorry, this question is required.	Swali hili ni lazima kujibiwa	selected(${risk_1},'high_risk') + selected(${risk_1},'medium_risk') + selected(${risk_1},'low_risk') + selected(${risk_1},'no_response')
select_multiple risk_3 or_other	risk_3	If you feel you are not at risk, why do you feel that you are not at risk for HIV infection?	Q825. Kama unahisi haupo katika hatari ya maambukizi ya virusi vya UKIMWI, kwa nini unahisi hivyo?	Multiple responses possible, but do not read choices aloud.	Kunaweza kuwa na jibu zaidi ya moja lakini usisome majibu.				yes	Sorry, this question is required.	Swali hili ni lazima kujibiwa	selected(${risk_1},'no_risk') + selected(${risk_1},'do_not_know')
note	HIV_services_note	Now I want to ask you about HIV testing and your use of other HIV health services.	Sasa nitakuuliza kuhusu kupima na kupokea huduma nyingine zinazohusu VVU.
select_one yes_no	HIV_test_1	Do you know of a place where people can go to have a confidential test to find out if they are infected with HIV?	Q901. Unafahamu mahali popote ambapo mtu anaweza kwenda kupima kwa siri ili kujua kuwa ameambukizwa virusi vya UKIMWI?	Confidential means that nobody will know the test result unless you want them to know	Siri ina maana kwamba hakuna atakayejua matokeo ya vipimo labda utake mwenyewe ajue				yes	Sorry, this question is required.	Swali hili ni lazima kujibiwa
select_one yes_no	HIV_test_2	Have you ever had an HIV test?	Q902. Je, umeshawahi kupima virusi vya UKIMWI?						yes	Sorry, this question is required.	Swali hili ni lazima kujibiwa
select_one HIV_test_1	HIV_test_3	When did you last get an HIV test for which you received the results?	Q903. Lini ilikuwa mara yako ya mwisho kupima virusi vya UKIMWI na kupata majibu?						yes	Sorry, this question is required.	Swali hili ni lazima kujibiwa	not(selected(${HIV_test_2}, 'no'))
select_one HIV_test_2	HIV_test_4	Where did you get your last HIV test for which you received the results?	Q904. Ni wapi ulipimia VVU kwa mara ya mwisho ambapo ulipokea majibu?						yes	Sorry, this question is required.	Swali hili ni lazima kujibiwa	not(selected(${HIV_test_2}, 'no'))
select_one HIV_test_3	HIV_test_5	What was the result of your last HIV test for which you got the results?	Q905. Majibu ya kipimo chako cha mwisho cha VVU uliyoyapokea yalikuaje?						yes	Sorry, this question is required.	Swali hili ni lazima kujibiwa	not(selected(${HIV_test_2}, 'no'))
select_one yes_no	care_treatment_1	Have you enrolled in HIV care and treatment services?	Q906. Umeandikishwa katika vituo vya kupata huduma na tiba ya virusi vya UKUMWI?						yes	Sorry, this question is required.	Swali hili ni lazima kujibiwa	selected(${HIV_test_5},'positive')
select_one HIV_link	care_treatment_2	[If yes] How were you linked to services?	Q907. Uliunganishwa vipi na huduma hizo?						yes	Sorry, this question is required.	Swali hili ni lazima kujibiwa	selected(${care_treatment_1},'yes')
select_one HIV_link_2	care_treatment_3	[If yes] How long was it from your first HIV+ test before you enrolled in HIV care and treatment services?	Q908. Ilichukua muda gani tangu ulipogundulika kuwa na maambukizi ya VVU hadi kuunganishwa kwenye vituo vya huduma na matibabu?						yes	Sorry, this question is required.	Swali hili ni lazima kujibiwa	selected(${care_treatment_1},'yes')
select_one yes_no	care_treatment_4	[If yes] Are you currently on ART?	Q909. Kwa sasa unatumia vidonge vya ARV?						yes	Sorry, this question is required.	Swali hili ni lazima kujibiwa	selected(${care_treatment_1},'yes')
select_one time_ART	care_treatment_6	[If yes] How long have you been on ART?	Q910. Ni kwa muda gani umekua ukitumia vidonge vya ARV?						yes	Sorry, this question is required.	Swali hili ni lazima kujibiwa	selected(${care_treatment_4},'yes')
select_one yes_no	care_treatment_7	Are you currently pregnant or breastfeeding?	Q911. Kwa sasa ni mjamzito au unanyonyesha?						yes	Sorry, this question is required.	Swali hili ni lazima kujibiwa	selected(${sex},'female')*selected(${care_treatment_6},'3_to_5_mo')
select_one no_ART or_other	no_ART	[If no] Why not?	Q912. Kwa nini?						yes	Sorry, this question is required.	Swali hili ni lazima kujibiwa	selected(${care_treatment_4},'no')
select_one no_care_treatment	care_treatment_5	Why have you not enrolled in care and treatment services?	Q913. Kwa nini hujajiandikisha katika vituo vya huduma na matibabu?						yes	Sorry, this question is required.	Swali hili ni lazima kujibiwa	selected(${care_treatment_1},'no')
select_multiple no_test or_other	HIV_test_6	Why have you never chosen to get an HIV test?	Q914. Kwa nini hujawahi kupima virusi vya UKIMWI?	Probe and select all that apply.	Dodosa na chagua majibu yote yanayohusika				yes	Sorry, this question is required.	Swali hili ni lazima kujibiwa	selected(${HIV_test_2}, 'no')
select_one yes_no_1	HIV_counseling_1	Have you ever attended HIV counseling with your permanent/steady partner?	Q915. Umewahi kuhudhuria ushauri nasaha wa VVU ukiwa pamoja na mwenza/mpenzi wako?						yes	Sorry, this question is required.	Swali hili ni lazima kujibiwa
select_one yes_no_1	HIV_counseling_2	Have you talked to your partner/boyfriend/husband about the results of your HIV tests?	Q916. Umewahi kuzungumza na mwenza/mpenzi wako juu ya majibu yako ya vipimo vya VVU?						yes	Sorry, this question is required.	Swali hili ni lazima kujibiwa	not(selected(${HIV_test_2}, 'no'))
note	services_note	In this last section, I will ask you some questions about the health services you have accessed and your experience with those services.	Katika sehemu hii ya mwisho, nitakuuliza maswali kidogo juu ya huduma za kiafya ulizowahi kupata pamoja na uzoefu wako juu ya huduma hizo.
select_one services	services_1	The last time you had a health concern, where did you go?	Q917. Mara ya mwisho ulipokuwa na tatizo la kiafya, ulienda wapi?						yes	Sorry, this question is required.	Swali hili ni lazima kujibiwa
select_multiple services_5 or_other	services_5	Why did you not seek services for your health concern?	Q918. Ulipokuwa na tatizo la kiafya, kwa nini hukutafuta huduma za afya?	Probe and select all that apply.	Dodosa na chagua majibu yote yanayohusika				yes	Sorry, this message is required.	Swali hili ni lazima kujibiwa	selected(${services_1}, 'did_not_do_anything')
select_multiple services_2 or_other	services_2	The last time you visited a health facility, what services did you receive?	Q919. Mara ya mwisho ulipotembelea kituo cha afya/ hospitali, je, ni huduma zipi ulizipata katika kituo/ hospitali hiyo?	If they have received more than 1 service, mark all that apply	Ikiwa amepokea huduma zaidi ya moja, chagua zote atakazotaja.				yes	Sorry, this question is required.	Swali hili ni lazima kujibiwa
select_one yes_no_2	services_3	Based on the way you were treated by the facility staff, would you return to that facility for services?	Q920. Kulingana na namna ulivyohudumiwa na wahudumu wa afya mara ya mwisho uliipotembelea kituo cha afya/ hospitali, je utapenda kurudi katika kiliniki au kituo hicho?						yes	Sorry, this question is required.	Swali hili ni lazima kujibiwa
select_multiple services_3	services_4	[If not] Which of these did you experience that makes you not want to return to that facility?	Q921. Ni yapi kati ya haya ulikumbana nayo yanayokufanya usitake kurudi kupata huduma katika kliniki au kituo hicho?	Read out the responses, mark all that apply	Msomee mshiriki majibu, chagua majibu yote yatakayotolewa.				yes	Sorry, this question is required.	Swali hili ni lazima kujibiwa	selected(${services_3},'no')
select_one yes_no	opioid_substitution_1	Have you ever received Opioid Substitution Therapy?	Q922. Ulishawahi kupokea tiba ya methadone?						yes	Sorry, this question is required.	Swali hili ni lazima kujibiwa
select_one 6_months	opioid_substitution_2	[If yes] For how long were you in Opioid Substitution therapy?	Q923. Ni kwa muda gani umekua katika matibabu haya?						yes	Sorry, this question is required.	Swali hili ni lazima kujibiwa	selected(${opioid_substitution_1},'yes')
select_one yes_no_6	peer_educator_1	Have you been in contact with any health peer educator in the community in the last 12 months?	Q924. Katika kipindi cha miezi 12 iliyopita, umewahi kukutana na mwelimishaji rika wa afya katika jamii?						yes	Sorry, this question is required.	Swali hili ni lazima kujibiwa
begin group	peer_educator_group											not(selected(${peer_educator_1}, 'peer'))
select_one peer_educator_contact	peer_educator_2	How many times have you been in contact with a peer educator in the last 12 months?	Q925. Katika kipindi cha miezi 12 iliyopita, ni mara ngapi ulikutana na mwelimishaji rika katika jamii?						yes	Sorry, this question is required.	Swali hili ni lazima kujibiwa	selected(${peer_educator_1}, 'yes')
select_multiple peer_educator_services or_other	peer_educator_3	What services or information did you receive from the peer educator?	Q926. Ni huduma gani au elimu gani uliyopata kutoka kwa mwelimishaji rika?	Read the answer choices aloud. Mark the service that applies; if they have received more than 1 service mark all that apply	Msomee majibu. Chagua huduma atakazozitaja; kama ametaja zaidi ya moja chagua zote				yes	Sorry, this question is required.	Swali hili ni lazima kujibiwa	selected(${peer_educator_1}, 'yes')
select_one yes_no_1	peer_educator_4	Did you feel that the peer educators were non-judgmental?	Q927. Ulihisi kuwa waelimishaji rika walikuwa watu wasiokuhukumu?						yes	Sorry, this question is required.	Swali hili ni lazima kujibiwa	selected(${peer_educator_1}, 'yes')
select_multiple NGO_peer or_other	peer_educator_5	The last time you received services in the community from a peer educator, which NGO was supporting those services?	Q928. Muda ule ulipopokea huduma katika jamii kutoka kwa muelimisha rika, ni shirika gani lisilo la kiserikali (NGO) lilikua linawezesha huduma hizo kutolewa?						yes	Sorry, this question is required.	Swali hili ni lazima kujibiwa	selected(${peer_educator_1}, 'yes')
end group
select_one yes_no_1	peer_educator_6	Have you been in contact with any community home-based care providers in the last 12 months?	Q929. Katika kipindi cha miezi 12 iliyopita umekuwa na mawasiliano na mhudumu yeyote wa afya majumbani?						yes	Sorry, this question is required.	Swali hili ni lazima kujibiwa
note	note_thank_you	READ ALOUD: We have come to the end of the interview. Thank you very much for your kind cooperation and spending your valuable time with me.	MSOMEE KWA SAUTI: Tumefika mwisho wa mahojiano. Ninashukuru sana kwa ushirikiano na muda wako wote uliokaa na mimi.
select_one number_of_coupons	number_of_coupons	Number of recruitment coupons given:	Idadi ya kuponi za usajili zilizotolewa						yes	Sorry, this question is required.	Swali hili ni lazima kujibiwa
barcode	coupon_1	Scan first recruitment coupon.	Scan first recruitment coupon.						yes	Sorry, this question is required.	Swali hili ni lazima kujibiwa	selected(${number_of_coupons},'one')
barcode	coupon_2_1	Scan first recruitment coupon.	Scan first recruitment coupon.						yes	Sorry, this question is required.	Swali hili ni lazima kujibiwa	selected(${number_of_coupons},'two')
barcode	coupon_2_2	Scan second recruitment coupon	Scan second recruitment coupon						yes	Sorry, this question is required.	Swali hili ni lazima kujibiwa	selected(${number_of_coupons},'two')
barcode	coupon_3_1	Scan first recruitment coupon.	Scan first recruitment coupon.						yes	Sorry, this question is required.	Swali hili ni lazima kujibiwa	selected(${number_of_coupons},'three')
barcode	coupon_3_2	Scan second recruitment coupon	Scan second recruitment coupon						yes	Sorry, this question is required.	Swali hili ni lazima kujibiwa	selected(${number_of_coupons},'three')
barcode	coupon_3_3	Scan third recruitment coupon.	Scan third recruitment coupon.						yes	Sorry, this question is required.	Swali hili ni lazima kujibiwa	selected(${number_of_coupons},'three')
note	note_viral_load	Mark on the Laboratory Requisition Form and in the Laboratory Tracking Logbook whether a viral load measurement is required.	Mark on the Laboratory Requisition Form and in the Laboratory Tracking Logbook whether a viral load measurement is required.

## Sheet: choices
list name	name	label::English	label::Swahili
school	no_school	Never went to school	Hajasoma
school	incomplete_primary	Did not complete primary	Hakumaliza elimu ya msingi
school	complete_primary	Completed primary	Amemaliza elimu ya msingi
school	incomplete_secondary	Did not complete secondary	Hakumaliza elimu ya sekondari
school	complete_secondary	Completed secondary	Amemaliza elimu ya sekondari
school	more_than_secondary	Higher than secondary education	Elimu ya juu (Chuo,chuo kikuu, n.k.)
school	no_response	No response	Hakujibu
marital_status	married_partner	Currently married/living with a partner	Nimeoa/nimeolewa au naishi na mpenzi
marital_status	sep_divorced_widow	Separated, divorced, or widowed	Nimetengana au nimeachika au mjane/mgane
marital_status	never_married	Never married	Sijawahi kuoa/kuolewa
marital_status	no_response	No response	Hakujibu
living	alone	Alone	Peke yako
living	wife_gf	With wife/girlfriend	Mke/mpenzi wako wa kike
living	husband_bf	With husband/boyfriend	Mume/mpenzi wako wa kiume
living	family	With family	Na jamaa(familia)
living	friends	With friends	Na rafiki
living	no_address	No fixed address (unsettled)	Hana mahali maalumu
living	no_response	No response	Hakujibu
work	government	Emplyed by government/parastatal	Mwajiriwa wa serikali
work	private_company	Employed by private company	Mwajiriwa kwenye sekta binafsi
work	self_employed	Self-employed	Nimejiajiri mwenyewe
work	student	Student	Mwanafunzi
work	petty_trading	Petty trading	Mchuuzi/biashara ndogondogo
work	illegal_activities	Illegal activities	Shughuli zisizo za halali
work	none	Currently unemployed	Sina kazi
work	no_response	No response	Hakujibu
yes_no	yes	Yes	Ndiyo
yes_no	no	No	Hapana
yes_no	no_response	No response	Hakujibu
enrollment	incentive	For incentive	Kwa ajili ya takrima (Posho/marupurupu)
enrollment	sti_hiv	For STI/HIV test results	Kujua hali ya afya yangu kuhusiana na maradhi ya kujamiiana na UKIMWI
enrollment	peer_influence	Peer influence	Nilishawishiwa na wenzangu/mwenzangu
enrollment	study_interesting_useful	Study seems interesting/useful	Nimevutiwa na utafiti/unamaana
enrollment	spare_time	I wasn't busy	Sikuwa na shughuli yoyote
enrollment	don’t_know	Don't know	Hajui
enrollment	no_response	No response	Hakujibu
recruiter_1	stranger	A stranger, someone you met for the first time	Mgeni kwangu, ndio kwanza nimekutana nae
recruiter_1	acquaintance	Someone you know, but not closely	Namjua, lakini sio kwa karibu sana
recruiter_1	close_friend	A close friend, someone you know very well	Rafiki wa karibu, namjua sana
recruiter_1	sex_partner	A sexual partner	Rafiki wa kimapenzi
recruiter_1	family_member	A family member or relation	Ni ndugu au jamaa
recruiter_1	drug_dealer	A drug dealer	Muuza madawa ya kulevya
recruiter_1	someone_you_inject_with	Someone you inject with	Mtu nnaejidunga madawa ya kulevya pamoja
recruiter_1	no_response	No response	Hakujibu
recruiter_2	every_day	Every day	Kila siku
recruiter_2	once_a_week	Once per week	Mara moja kwa wiki
recruiter_2	once_a_month	Once per month	Mara moja kwa mwezi
recruiter_2	less_than_one_a_month	Less than once per month	Chini ya mara moja kwa mwezi
recruiter_2	no_response	No response	Hakujibu
recruiter_3	less_than_six_months	Less than 6 months	Chini ya miezi 6
recruiter_3	six_months_to_year	6 months to 1 year	Miezi 6 hadi mwaka 1
recruiter_3	one_to_two_years	1-2 years	Miaka 1-2
recruiter_3	more_than_two_years	More than 2 years	Zaidi ya miaka 2
recruiter_3	no_response	No response	Hakujibu
object	time_frame_distribution	20-27 October 2017	20-27 October 2017
object	other_time	Other time	Muda mwengine
object	no_response	No response	Hakujibu
object_color	pink	Pink	Wardi (pink)
object_color	green	Green	Kijani
object_color	purple	Purple	Zambarau
object_color	do_not_remember	Don't remember	Sikumbuki
alcohol_frequency	never	Never	Sijawahi
alcohol_frequency	once_mo	Once a month or less	Mara moja au chini ya mara moja kwa mwezi
alcohol_frequency	2_4_mo	2-4 times a month	Mara 2-4 kwa mwezi
alcohol_frequency	2_3_week	2-3 times a week	Mara 2-3 kwa wiki
alcohol_frequency	4_more_week	4 or more times a week	Mara 4 au zaidi kwa wiki
alcohol_frequency	do_not_remember	Don't remember	Sikumbuki
alcohol_frequency	no_response	No response	Hakujibu
alcohol_drinks	1_2	1 or 2	1 au 2
alcohol_drinks	3_4	3 or 4	3 au 4
alcohol_drinks	5_6	5 or 6	5 au 6
alcohol_drinks	7_8_9	7, 8 or 9	7, 8 au 9
alcohol_drinks	10_more	10 or more	10 au zaidi
alcohol_drinks	do_not_remember	Don't remember	Sikumbuki
alcohol_drinks	no_response	No response	Hakujibu
introduce_drug	husband_wife	Husband/wife	Mume/mke wangu
introduce_drug	bf_gf	Boyfriend/girlfriend	Mpenzi wa kike/kiume
introduce_drug	friend	Friend	Rafiki
introduce_drug	neighbor	Neighbor	Jirani
introduce_drug	family	Family member	Ndugu katika familia
introduce_drug	drug_seller	Drug seller	Muuzaji wa dawa za kulevya
introduce_drug	drug_user	Other drug user	Mtumiaji mwingine wa dawa za kulevya
introduce_drug	do_not_remember	Don't remember	Sikumbuki
introduce_drug	no_response	No response	Hakujibu
yes_no_1	yes	Yes	Ndiyo
yes_no_1	no	No	Hapana
yes_no_1	do_not_remember	Don't remember	Sikumbuki
yes_no_1	no_response	No response	Hakujibu
condom_frequency	always	Always	Mara zote
condom_frequency	most_of_the_time	Most of the time	Mara nyingi
condom_frequency	occasionally	Occasionally	Mara moja moja
condom_frequency	never	Never	Sijatumia hata mara moja
condom_frequency	no_sex	Didn't have sex past month	Sikufanya ngono mwezi uliopita
condom_frequency	dont_remember	Don't remember	Sikimbuki
condom_frequency	no_response	No response	Hakujibu
condom_supply	shop	Shop	Dukani
condom_supply	pharmacy	Pharmacy	Duka la dawa
condom_supply	health_facility	Health facility	Kituo cha afya
condom_supply	bar_guesthouse_hotel	Bar/guesthouse/ hotel	Kilabu cha pombe/nyumba ya kulala wageni/ hoteli
condom_supply	friends	Friends	Rafiki
condom_supply	taxi_drivers	Taxi drivers	Dereva wa teksi
condom_supply	saloon	Saloon	Saluni
condom_supply	ngo	NGO	Asasi zisizokuwa za serikali
condom_supply	public_office	Public office	Ofisi ya serikali
condom_supply	peer_educator	Peer educator	Muelimishaji rika
condom_supply	did_not_buy_condom	Did not buy male condom in the last month	Sijanunua kondom katika mwezi mmoja uliopita
condom_supply	dont_remember	Don't remember	Sikumbuki
condom_supply	no_response	No response	Hakujibu
condom_avail_1	yes	Yes	Ndiyo
condom_avail_1	no	No	Hapana
condom_avail_1	never_needed	Never needed one	Sijawahi kuhitaji
condom_avail_1	dont_know	Don't know	Sijui
condom_avail_1	no_response	No response	Hakujibu
condom_avail_2	costs_too_much	Costs too much	Ni ghali sana
condom_avail_2	shop_too_far	Shop too far away	Duka liko mbali sana
condom_avail_2	shops_closed	Shops closed	Maduka yamefungwa
condom_avail_2	pharmacy_too_far	Pharmacy too far away	Duka la dawa liko mbali sana
condom_avail_2	pharmacy_closed	Pharmacy closed	Duka la madawa limefungwa
condom_avail_2	embarssed_to_buy	Embarassed to buy condom	Ninaona haya kununua kondomu
condom_avail_2	dont_know_where	Don't know where to obtain	Sijui zinapatikana wapi
condom_avail_2	things_happen_fast	Things happen too fast	Mambo yalitokea kwa ghafla
condom_avail_2	dont_need_condom	Don't need condom	Sihitaji Kondomu
condom_avail_2	dont_know	Don't know	Sijui
condom_avail_2	no_response	No response	Hakujibu
f_condom_supply	shop	Shop	Dukani
f_condom_supply	pharmacy	Pharmacy	Duka la dawa
f_condom_supply	health_facility	Health facility	Kituo cha afya
f_condom_supply	bar_guesthouse_hotel	Bar/guesthouse/ hotel	Bar/nyumba ya kulala wageni/hoteli
f_condom_supply	friends	Friends	Rafiki
f_condom_supply	taxi_drivers	Taxi drivers	Dereva wa teksi
f_condom_supply	saloon	Saloon	Saluni
f_condom_supply	ngo	NGO	Asasi zisizokuwa za serikali
f_condom_supply	public_office	Public office	Ofisi ya serikali
f_condom_supply	peer_educator	Peer educator	Muelimishaji rika
f_condom_supply	dont_remember	Don't remember	Sikumbuki
f_condom_supply	no_response	No response	Hakujibu
drugs_1	hash_marijuana	Smoked hashish/marijuana	Kuvuta Bangi
drugs_1	crack_cocaine	Smoked crack cocaine	Kuvuta Kokein
drugs_1	heroin	Smoked heroin	Kuvuta Heroin
drugs_1	cocaine	Inhaled cocaine	Kunusa Kokein
drugs_1	cocktail	Mixed cocktail	Kuchanganya unga na bangi (Cocktail)
drugs_1	chase_the_dragon	Chase the dragon	Kupiga bati (chase the dragon)
drugs_1	petrol_glue	Sniffed petrol, glue	Kunusa petrol, gundi
drugs_1	valium	Valium	Kula vidonge vya usingizi (Valium)
drugs_1	pain_killers	Pain killers (prescription drugs)	Kula vidonge vya maumivu (pain killer)
drugs_2	brown_heroin	Brown heroin	Brown heroin
drugs_2	white_heroin	White heroin	White heroin
drugs_2	opium	Opium	Opium
drugs_2	amphetamine	Amphetamines	Amphetamines
drugs_2	prescription_drugs	Prescription drugs	Madawa yanayotolewa hospitalini
drug_frequency	once_a_month_or_less	Once a month or less	Mara moja au chini ya mara moja kwa mwezi
drug_frequency	several_times_a_month	Several times a month, but less than once a week	Zaidi ya mara moja kwa mwezi, lakini chini ya mara moja kwa wiki
drug_frequency	once_a_week	Once a week	Mara moja kwa wiki
drug_frequency	several_times_a_week	Several times a week, but not every day	Zaidi ya mara moja kwa wiki, lakini sio kila siku
drug_frequency	once_a_day	Once a day	Mara moja kwa siku
drug_frequency	several_times_a_day	Several times a day	Zaidi ya mara moja kwa siku
drug_frequency	dont_remember	Don't remember	Sikumbuki
violence	police	Police	Polisi
violence	drug_dealer	Drug dealer	Muuzaji dawa za kulevya
violence	husband_bf	Husband/boyfriend	Mume wako/rafiki wa kiume
violence	wife_gf	Wife/girlfriend	Mke wako/rafiki yako wa kike
violence	friends	Friends	Rafiki
violence	family	Family member	Ngugu/jamaa
violence	unknown	Unknown person	Simfahamu/Mtu wa mitaani
violence	do_not_remember	Do not remember	Sikumbuki
violence	no_response	No response	Hakujibu
arrested	drug_use	Drug use	Kutumia dawa za kulevya
arrested	aggravated_assault	Aggravated assault	Ugomvi
arrested	theft	Theft	Kuiba
arrested	selling_sex	Selling sex	Kuuza ngono
arrested	loitering	Loitering	Kuzurura ovyo
arrested	selling_drugs	Selling drugs	Kuuza madawa ya kulevya
arrested	dont_remember	Don't know/remember	Sikumbuki
arrested	no_response	No response	Hakujibu
agree_disagree	agree	Agree	Nakubali
agree_disagree	disagree	Disagree	Sikubali
agree_disagree	dont_know	Don't know	Sijui
risk_1	high_risk	High risk	Hatari kubwa
risk_1	medium_risk	Medium risk	Hatari kiasi
risk_1	low_risk	Low risk	Hatari ndogo
risk_1	no_risk	No risk	Hakuna hatari yoyote
risk_1	do_not_know	Don't know	Sijui
risk_1	no_response	No response	Hakujibu
prep_no	worry_about_confidentiality	I worry about someone finding out and thinking I am HIV positive.	Nina wasiwasi kuhusu mtu kufahamu na kudhani kuwa nina maambukizi ya virusi vya UKIMWI
prep_no	dont_like_drugs	I don't like taking drugs.	Sipendi kutumia dawa
prep_no	dont_think_risk	I don't think I am at risk for HIV.	Sidhani kama nipo hatarini kupata maambukizi ya VVU
prep_no	not_access_to_services	I am not able to access services easily.	Siwezi kuzifikia huduma kirahisi
prep_no	worry_about_side_effects	I worry about side effects from drugs.	Nina wasiwasi kuhusu madhara ya dawa
HIV_test_1	in_past_year	In the past year	Katika mwaka uliopita
HIV_test_1	over_one_year	Over one year ago	Zaidi ya mwaka mmoja uliopita
HIV_test_1	never	Never	Sijawahi
HIV_test_1	dont_remember	Don't remember	Sikumbuki
HIV_test_1	no_response	No response	Hakujibu
HIV_test_2	health_facility	Health facility including hospital	Kituo cha afya ikiwa ni pamoja na hospitali
HIV_test_2	community	Community	Kwenye jamii
HIV_test_2	self_test	Self-test	Nilijipima mwenyewe
HIV_test_2	research_projects	Research projects	Miradi ya utafiti
HIV_test_2	no_response	No response	Hakuna jibu
HIV_test_3	positive	Positive	Chanya
HIV_test_3	negative	Negative	Hasi
HIV_test_3	not_comfortable	Not comfortable saying	Sijisikii huru kusema
HIV_link	referral_slip	Went on my own with referral slip	Nilienda peke yangu na fomu ya rufaa
HIV_link	peer_escort	Escorted by peer from NGO	Nilisindikizwa na rika kutoka NGO
HIV_link	facility_staff_escort	Escorted by facility staff to CTC	Nilisindikizwa na mhudumu wa afya kwenda CTC
HIV_link	CBHS_escort	Escorted by CBHS	Nilisindikizwa na mtoa huhuma ya jamii
HIV_link_2	same_day	Same day	Siku hiyo hiyo
HIV_link_2	within_one_week	Within one week	Ndani ya wiki moja
HIV_link_2	within_two_weeks	Within two weeks	Ndani ya wiki mbili
HIV_link_2	longer_than_two_weeks	Longer than two weeks	Zaidi ya wiki mbili
HIV_link_2	dont_remember	Don't remember	Sikumbuki
no_ART	was_not_prescribed	Was not prescribed ART	Sikuandikiwa dawa za ARV
no_ART	opted_out_ART	Opted out of ART/did not want to take ART	Nilichagua kutotumia dawa za ARV/ Sikutaka kutumia ARV
no_care_treatment	dont_think_need	Don't think I need to enroll now	Sidhani kama ninahitaji kujiandikisha sasa hivi
no_care_treatment	worried_about_side_effects	Worried about side effects of ARVs	Nina wasiwasi kuhusu madhara ya ARVs
no_care_treatment	worried_about_bad_tx	Worried about being badly treated by HCWs	Nina wasiwasi kuhusu kuhudumiwa vibaya na wahudumu wa afya
no_care_treatment	worried_confidentiality	Worried someone they know might see them at CTC	Nina wasiwasi kuwa mtu anayenifahamu anaweza kuniona kwenye kituo cha kutolea huduma (CTC)
no_care_treatment	traditional_healer	Went to alternative treatment	Nilienda kwenye tiba mbadala
no_test	didn't_know_where_to_go	Didn't know where to go	Sikujua wapi pa kwenda
no_test	dont_feel_risk	Don’t feel at risk	Sioni hatari yoyote
no_test	concern_confidentiality	Concerned about confidentiality	Hakuna siri
no_test	negative_HCW	Negative attitude of health care workers	Mtazamo mbaya wa watendaji wa huduma za afya
no_test	cost	Cost	Gharama
no_test	distance	Distance	Umbali
no_test	fear_of_status	Fear of knowing status	Woga wa kujielewa kama nimeambukizwa
no_test	not_important	Not important for me	Si muhimu kwangu
no_test	dont_know	Don't know	Sikumbuki
no_test	no_response	No response	Hakujibu
services	pharmacy	Pharmacy	Maduka ya dawa
services	public_health_facility	Public health facility/hospital	Vituo vya afya/hospitali za umma
services	private_health_facility	Private health facility/hospital	Vituo vya afya/hospitali vya binafsi
services	outreach	Outreach	Huduma mitaani (outreach)
services	peer	Peer educator/NGO	Muelimishaji rika/NGO
services	treated_myself_at_home	Treated myself at home	Nilijitibu mwenyewe nyumbani
services	traditional	Alternative treatment	Tiba mbadala
services	did_not_do_anything	Did not do anything/go anywhere	Sikufanya chochote/sikwenda popote
services	dont_remember	Don't remember	Sikumbuki
services	no_response	No response	Hakujibu
services_2	received_condoms	Received condoms	Alipewa kondomu
services_2	information_prevention	Information on STI or HIV transmission or prevention	Elimu juu ya maambukizi ya magojwa ya zinaa au UKIMWI na namna ya kujikinga
services_2	counseling	Counseling from a professional/VCT counselor	Ushauri nasaha kutoka kwa mtaalamu wa ushauri nasaha
services_2	hiv_test	An HIV Test	Kupima VVU
services_2	opd_services	General OPD services	Huduma za wagonjwa wa nje
services_2	family_planning	Family planning	Uzazi wa mpango
services_2	anc	ANC/PMTCT	ANC/PMTCT
services_2	care_treatment	Care and treatment	Huduma na matibabu ya VVU
services_2	dont_remember	Don't remember	Sikumbuki
services_2	no_response	No response	Hakujibu
yes_no_6	yes	Yes	Ndiyo
yes_no_6	no	No	Hapana
yes_no_6	peer	Is a peer educator	Ni mwelimisha rika
yes_no_6	dont_know	Don't know	Sikumbuki
yes_no_6	no_response	No response	Hakujibu
peer_educator_contact	one_time	One time only	Mara moja tu
peer_educator_contact	two_times	Two times	Mara mbili
peer_educator_contact	three_times	Three times	Mara tatu
peer_educator_contact	four_times	Four times	Mara nne
peer_educator_contact	five_plus	Five or more times	Mara tano au zaidi
peer_educator_contact	dont_remember	Don't remember	Sikumbuki
peer_educator_contact	no_response	No response	Hakujibu
peer_educator_services	general_STI	General STI or HIV transmission or prevention information	Elimu ya kawaida ya namna ya kujikinga na magojwa ya ngono na UKIMWI
peer_educator_services	condoms	Condoms	Kondomu
peer_educator_services	HIV_test	HIV test in your home	Kupima VVU nyumbani
peer_educator_services	lubrication	Lubrication	Vilainishi
peer_educator_services	referral_STI	Referral for STI treatment	Rufaa kwa ajili ya kutibiwa mangojwa ya ngono
peer_educator_services	referral_VCT	Referral for VCT	Rufaa kwenda kwenye ushauri nasaha na kupima VVU
peer_educator_services	referral_PMTCT	Referral for PMTCT or family planning	Rufaa kwenda kwenye huduma ya kupunguza maambukizo ya VVU kutoka kwa mama kwenda kwa mtoto au uzazi wa mpango
peer_educator_services	referral_TB	Referral for TB screening	Rufaa kwenda kupima Kifua kikuu
peer_educator_services	bleach_kit	Bleach kit	Bleach ya kusafishia sindano (Kama JIK)
peer_educator_services	clean_needles	Clean needles	Mabomba/Sindano safi
peer_educator_services	dont_remember	Don't remember	Sikumbuki
peer_educator_services	no_response	No response	Hakujibu
NGO_peer	sauti	Sauti	MKUKUTE
NGO_peer	mdh	MDH	YOVERLEBE
NGO_peer	passada	Passada	PASADA
NGO_peer	mdm	MDM	MDM
NGO_peer	never_community_services	Never received services in the community from a peer educator	Sijawahi kupokea huduma katika jamii kutoka kwa mwelimisha rika
NGO_peer	don’t_know	Don't know	Sijui
risk_2	often_change_partners	I often change sex partners.	Kwa sababu nabadilisha wapenzi
risk_2	dont_use_condom	I don't always use a condom.	Kwa sababu situmii kondomu
risk_2	use_drugs	I use drugs.	Natumia dawa za kulevya
risk_2	inject_drugs	I inject drugs.	Najidunga sindano ya dawa za kulevya
risk_2	share_needles	I share needles.	Najidunga dawa za kulevya kwa kutumia sindano ambazo zishatumiwa na watu mwengine
risk_2	sex_with_IDU	I have sex with IDUs.	Ninafanya ngono na wanaojidunga sindano ya dawa za kulevya
risk_2	dont_know	Don't know	Sikumbuki
risk_2	no_response	No response	Hakujibu
risk_3	faithful	I am faithful	Mimi ni muaminifu
risk_3	always_condoms	I always use condoms	Mara zote natumia kondomu
risk_3	partner_clean	I'm convinced my partner is clean	Naamini mteja wangu yuko safi
risk_3	no_anal_sex	I don't have anal sex	Sijawahi kujamiiana kwa njia ya haja kubwa
risk_3	no_sex_sex_worker	I never have sex with sex workers	Sijawahi kujamiiana na anayeuza ngono
risk_3	dont_know	Don't know	Sikumbuki
risk_3	no_response	No response	Hakujibu
yes_no_2	yes	Yes	Ndiyo
yes_no_2	no	No	Hapana
yes_no_2	dont_know	Don't know	Sijui
yes_no_2	no_response	No response	Hakujibu
needle	pharmacy	Pharmacy	Duka la dawa
needle	health_establishment	Health establishment	Kituo cha afya
needle	drug_seller	Drug seller	Wauzaji wa madawa ya kulevya
needle	drug_user	Fellow drug user	Watumiaji wenzangu wa madawa ya kulevya
needle	outreach_worker	Outreach health worker	Kutoka kwa wahudumu wa afya mitaani
needle	peer_educator	Peer educator	Waelimishaji rika
needle	drop_in_center	Drop-in center	Kituo cha huduma na ushauri kwa “wateja”
needle	private_home	Private home known to have clean needles available	Nyumba binafsi za watu zinazojulikana kuwa na sindano safi
needle	no_response	No response	Hakujibu
yes_no_4	yes	Yes	Ndiyo
yes_no_4	no	No	Hapana
yes_no_4	never_tried	Never tried	Sijawahi kutafuta
yes_no_4	no_response	No response	Hakujibu
needle_access	expense	Needles/syringes too expensive	Bomba na sindano ni ghali sana
needle_access	seller_closed	Vendor/needle seller closed or not around	Wauzaji wa bomba na sindano wanapofunga au wanapokuwa hawapo
needle_access	size_unavailable	Preferred size not available	Aina ya bomba na sindano ninayohitaji hakuna
needle_access	vendor_out	Vendor ran out/stock out	Bomba na sindano zimeisha
needle_access	vendor_far	Vendor too far away	Wauzaji wapo mbali sana
needle_access	do_not_know_where	Do not know where to get	Sijui wapi nitapata bomba na sindano
needle_access	no_need	No need	Hakuna haja
needle_access	refuse_sell	Retailers refuse to sell to me	Wauzaji wanakataa kuniuzia
needle_access	no_response	No response	Hakujibu
yes_no_5	yes	Yes	Ndiyo
yes_no_5	no	No	Hapana
yes_no_5	do_not_know_remember	Don't know/don't remember	Sijui/sikumbuki
yes_no_5	no_response	No response	Hakujibu
clean_needle	cold_water	Cold water	Maji ya baridi
clean_needle	hot_water	Hot water	Maji ya moto
clean_needle	bleach	Bleach	Dawa ya kutolea madoa (Blich)
clean_needle	soap	Soap	Sabuni
clean_needle	alcohol	Alcohol	Spiriti
sharing_partner	wife_gf	Wife/girlfriend	Mke/ rafiki wa kike
sharing_partner	husband_bf	Husband/boyfriend	Mume/rafiki wa kiume
sharing_partner	sex_worker	Sex worker	Muuza ngono
sharing_partner	paid_sex	Someone who paid you for sex	Mtu aliyekulipa kwa ajili ya ngono
sharing_partner	other_partner	Other sexual partner	Mshirika wa aina nyengine wa maswala ya ngono
sharing_partner	idu	Injecting drug user	Mtumiaji wa dawa za kulevya kwa njia ya kujidunga sindano
sharing_partner	shooting_gallery_person	Shooting gallery person	Mtumiaji mwingine katika eneo la kujidunga
sharing_partner	no_response	No response	Hakujibu
needle_share	too_expensive	Needles/syringes too expensive	Bomba na sindano ni ghali sana
needle_share	preference	Prefer to share with friend	Nilipendelea kushirikiana na rafiki
needle_share	injector_wanted	Other injector wanted me to	Watumiaji wengine walinitaka nishiriki
needle_share	not_enough_alone	Did not have enough money to inject alone	Sikuwa na pesa za kutosha kujidunga mwenyewe
needle_share	cannot_inject	Cannot inject myself	Siwezi kujidunga mwenyewe
needle_share	not_available	Syringes/needles not available	Bomba/Sindano hazipatikani
needle_share	no_response	No response	Hakujibu
6_months	less_than_6_mo	Less than six months	Chini ya miezi sita
6_months	more_than_6_mo	More than six months	Zaidi ya miezi sita
drug_prep	always	Always	Kila mara
drug_prep	most_of_the_time	Most of the time	Mara nyingi
drug_prep	occasionally	Occasionally	Mara moja moja
drug_prep	never	Never	Sijawahi
drug_prep	no_response	No response	Hakujibu
number_of_coupons	one	One	Moja
number_of_coupons	two	Two	Mbili
number_of_coupons	three	Three	Tatu
injection_frequency	always	Always	Kila mara
injection_frequency	most_of_the_time	Most of the time	Mara nyingi
injection_frequency	occasionally	Occasionally	Mara moja moja
injection_frequency	no_response	No response	Hakujibu
services_3	spoke_unkindly	Health workers spoke unkindly to you	Wahudumu wa afya hawakuzungumza na wewe vizuri
services_3	gossip	Health workers gossiped about you to other health workers/clients	Wahudumu wa afya walikusengenya kwa wahudumu/ wateja wengine
services_3	confidentiality	Health workers shared information about you and your drug use behaviors with other health workers/clients	Wahudumu wa afya walitoataarifa zinazokuhusu juu ya tabia yako ya kutumia madawa kwa wahudumu/ wateja wengine
services_3	not_explain_medications	Health workers did not take time to explain medications or procedures to you	Wahudumu wa afya hawakuchukua muda kukuelezea utaratibu wa dawa
services_3	abuse	Health workers were physically abusive to you	Wahudumu alinipiga au alinisukumiza
services_3	avoid_contact	Health workers avoided physical contact with you	Wahudumu wa afya walikuwa wanakwepa kukushika
sex	male	Male	Mwanaume
sex	female	Female	Mwanamke
injection_frequency_1	always	Always	Kila mara
injection_frequency_1	most_of_the_time	Most of the time	Mara nyingi
injection_frequency_1	occasionally	Occasionally	Mara moja moja
injection_frequency_1	never	Never	Sijawahi
injection_frequency_1	dont_remember	Don't remember	Sikumbuki
injection_frequency_1	no_response	No response	Hakujibu
services_5	no_money	Not enough money	Sikuwa na pesa za kutosha
services_5	provider_discrimination	Did not think I would be treated well by provider	Sikudhani kuwa ningetibiwa vizuri na muhudumu wa afya
services_5	seeing_someone_I_know	Worried about seeing someone I know	Nilikuwa na wasiwasi wa kuonana na mtu ninayemfahamu
services_5	resolve_itself	Thought health problem would go away by itself	Nilidhani tatizo la afya lingeisha lenyewe
services_5	dont_remember	Don't remember	Sikumbuki
services_5	no_response	No response	Hakujibu
time_ART	less_than_3_mo	Less than three months	Chini ya miezi mitatu
time_ART	3_to_5_mo	Three to five months	Miezi 3-5
time_ART	6_mo_plus	Six months or longer	Miezi 6 au zaidi
time_ART	do_not_know_remember	Don't know/don't remember	Sijui/sikumbuki
time_ART	no_response	No response	Hakujibu
district	ubungo	Ubungo	Ubungo
district	kinondoni	Kinondoni	Kinondoni
district	ilala	Ilala	Ilala
district	temeke	Temeke	Temeke
district	kigamboni	Kigamboni	Kigamboni

## Sheet: settings
form_title	form_id	default_language
Dar BSS 2017 - PWID_13Nov2017	dar_bss_pwid_13Nov2017	Swahili
